# Supplementary material for: One-trial learning in larval Drosophila
Source: PubMed Central journal article supplement — Learn Mem. 2019 Apr;26(4):109–20. doi: 10.1101/lm.049106.118 (PMC6432171; doi:10.1101/lm.049106.118), 2019-04
Supplement: supp_26.4.109_Supplemental_Fig_S2.pdf [file supp_26.4.109_Supplemental_Fig_S2.pdf]

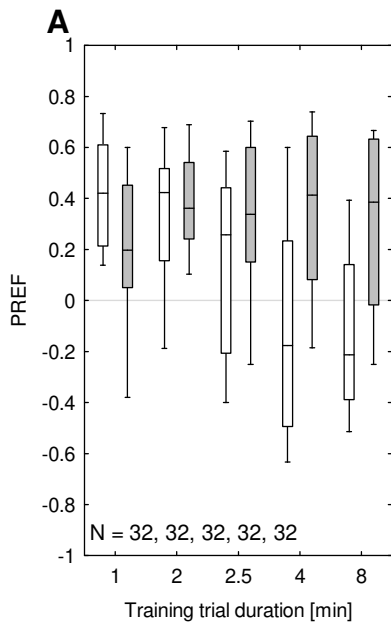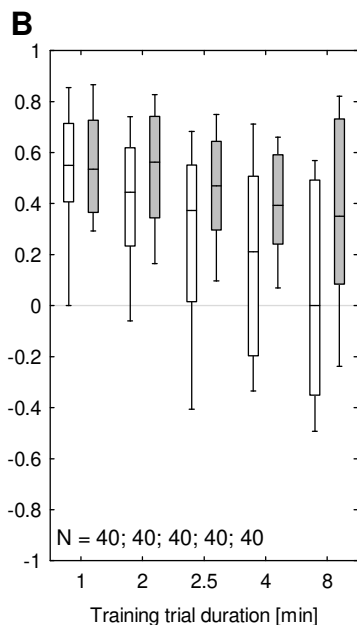

**Figure S2: Preference scores underlying the performance indices from Figure 2.** Documentation of preference scores (PREF) after paired (open boxes) and unpaired (boxes with grey fill) training for the indicated training trial durations and the respective aversive reinforcer **(A)** high-concentration salt and **(B)** quinine. Box plots show the median as the middle line, the 25/75 % quantiles as box boundaries, and the 10/90 % quantiles as whiskers. Sample sizes are indicated within the figure.
