# Supplementary material for: One-trial learning in larval Drosophila
Source: PubMed Central journal article supplement — Learn Mem. 2019 Apr;26(4):109–20. doi: 10.1101/lm.049106.118 (PMC6432171; doi:10.1101/lm.049106.118), 2019-04
Supplement: supp_26.4.109_Supplemental_Fig_S3.pdf [file supp_26.4.109_Supplemental_Fig_S3.pdf]

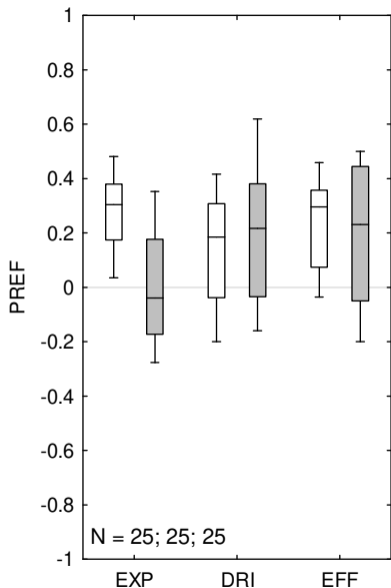

**Figure S3: Preference scores underlying the performance indices from Figure 3.** Documentation of preference scores (PREF) after paired (open boxes) and unpaired (boxes with grey fill) training for the experimental genotype (EXP) and both genetic controls (DRI, EFF). Box plots show the median as the middle line, the 25/75 % quantiles as box boundaries, and the 10/90 % quantiles as whiskers. Sample sizes are indicated within the figure.
