# Supplementary material for: One-trial learning in larval Drosophila
Source: PubMed Central journal article supplement — Learn Mem. 2019 Apr;26(4):109–20. doi: 10.1101/lm.049106.118 (PMC6432171; doi:10.1101/lm.049106.118), 2019-04
Supplement: supp_26.4.109_Supplemental_Fig_S5.pdf [file supp_26.4.109_Supplemental_Fig_S5.pdf]

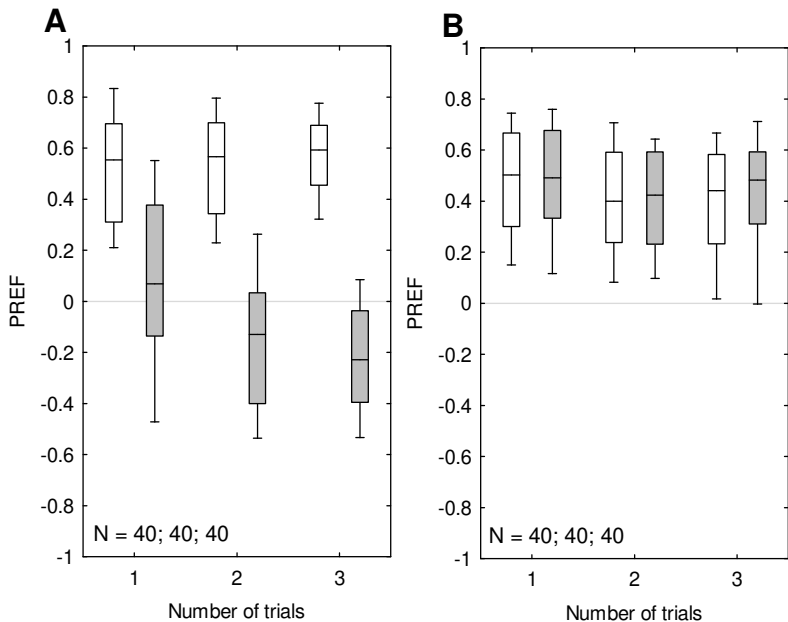

**Figure S5: Preference scores underlying the performance indices from Figure 5.** Documentation of preference scores (PREF) after paired (open boxes) and unpaired (boxes with grey fill) training for the two groups which were identically trained but tested either on **(A)** a pure or **(B)** a fructose substrate. Data are displayed as box plots, with the median as the middle line, the box boundaries as 25 and 75 % quantiles, and the whiskers as 10 and 90 % quantiles. Sample sizes are indicated within the figure.
