# Supplementary material for: One-trial learning in larval Drosophila
Source: PubMed Central journal article supplement — Learn Mem. 2019 Apr;26(4):109–20. doi: 10.1101/lm.049106.118 (PMC6432171; doi:10.1101/lm.049106.118), 2019-04
Supplement: supp_26.4.109_Supplemental_Fig_S6.pdf [file supp_26.4.109_Supplemental_Fig_S6.pdf]

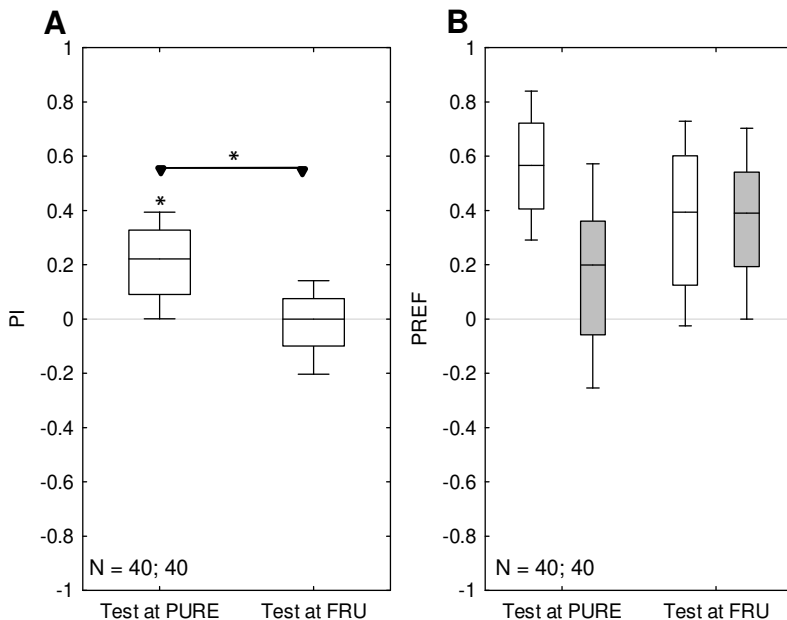

**Figure S6: Performance and preference scores underlying the microbehavioral analysis in Figure 6C-D. (A)** One-trial associative memory is not behaviorally expressed in the presence of fructose during the test. Larvae underwent single training trials of 2.5 min duration, with odor and fructose reward either together (Paired) or separate (Unpaired). This experiment depicts a true repetition of the experiment shown in Figure 4. **(B)** Documentation of preference scores (PREF) after paired (open boxes) and unpaired (boxes with grey fill) training for the two groups which were identically trained but tested either on a pure or a fructose substrate. Data are displayed as box plots, with the median as the middle line, the box boundaries as 25 and 75 % quantiles, and the whiskers as 10 and 90 % quantiles. Sample sizes are indicated within the figure.
