# Supplementary material for: One-trial learning in larval Drosophila
Source: PubMed Central journal article supplement — Learn Mem. 2019 Apr;26(4):109–20. doi: 10.1101/lm.049106.118 (PMC6432171; doi:10.1101/lm.049106.118), 2019-04
Supplement: supp_26.4.109_Supplemental_Fig_S8.pdf [file supp_26.4.109_Supplemental_Fig_S8.pdf]

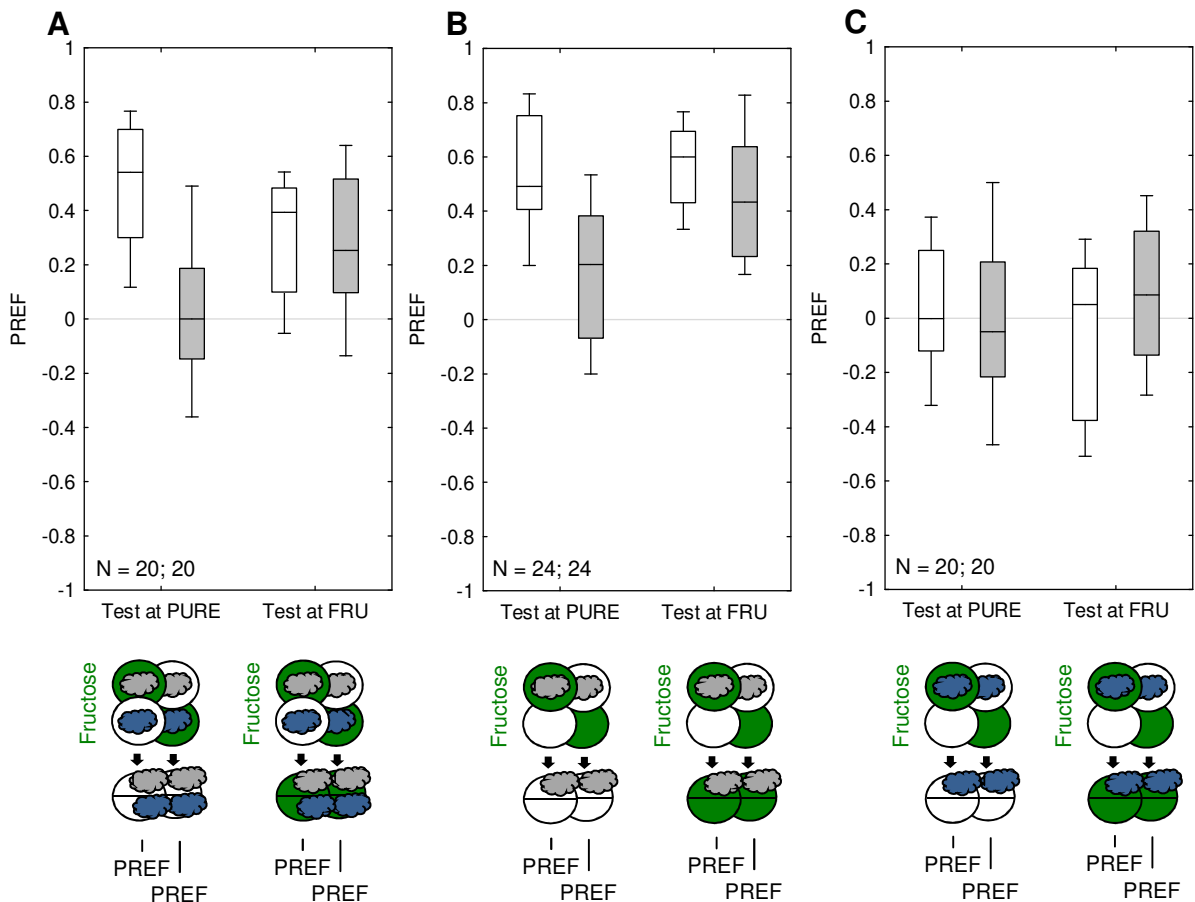

**Figure S8: Preference scores underlying the performance indices from Figure 8.** Documentation of preference scores (PREF) for the sketched training and testing conditions in **(A)** a two-odor paradigm with n-amylacetate and 1-octanol as odors (grey and blue clouds, respectively), **(B)** a one-odor paradigm with n-amylacetate as odor, or **(C)** a one-odor paradigm with 1-octanol as odor. Green Petri dishes indicate fructose; dishes without fill indicate Petri dishes with only the substrate, i.e. pure agarose, but without any tastant added. In **(A)**, positive preference scores reflect a relative preference for n-amylacetate rather than 1-octanol as the choice alternative, in **(B)** they reflect preference for n-amylacetate, and in **(C)** preference for 1-octanol. Data are displayed as box plots, with the median as the middle line, the box boundaries as 25 and 75 % quantiles, and the whiskers as 10 and 90 % quantiles. Sample sizes are indicated within the figure.
