# Supplementary figures and images for: One-trial learning in larval Drosophila
Source: PubMed Central journal article supplement — Learn Mem. 2019 Apr;26(4):109–20. doi: 10.1101/lm.049106.118 (PMC6432171; doi:10.1101/lm.049106.118), 2019-04

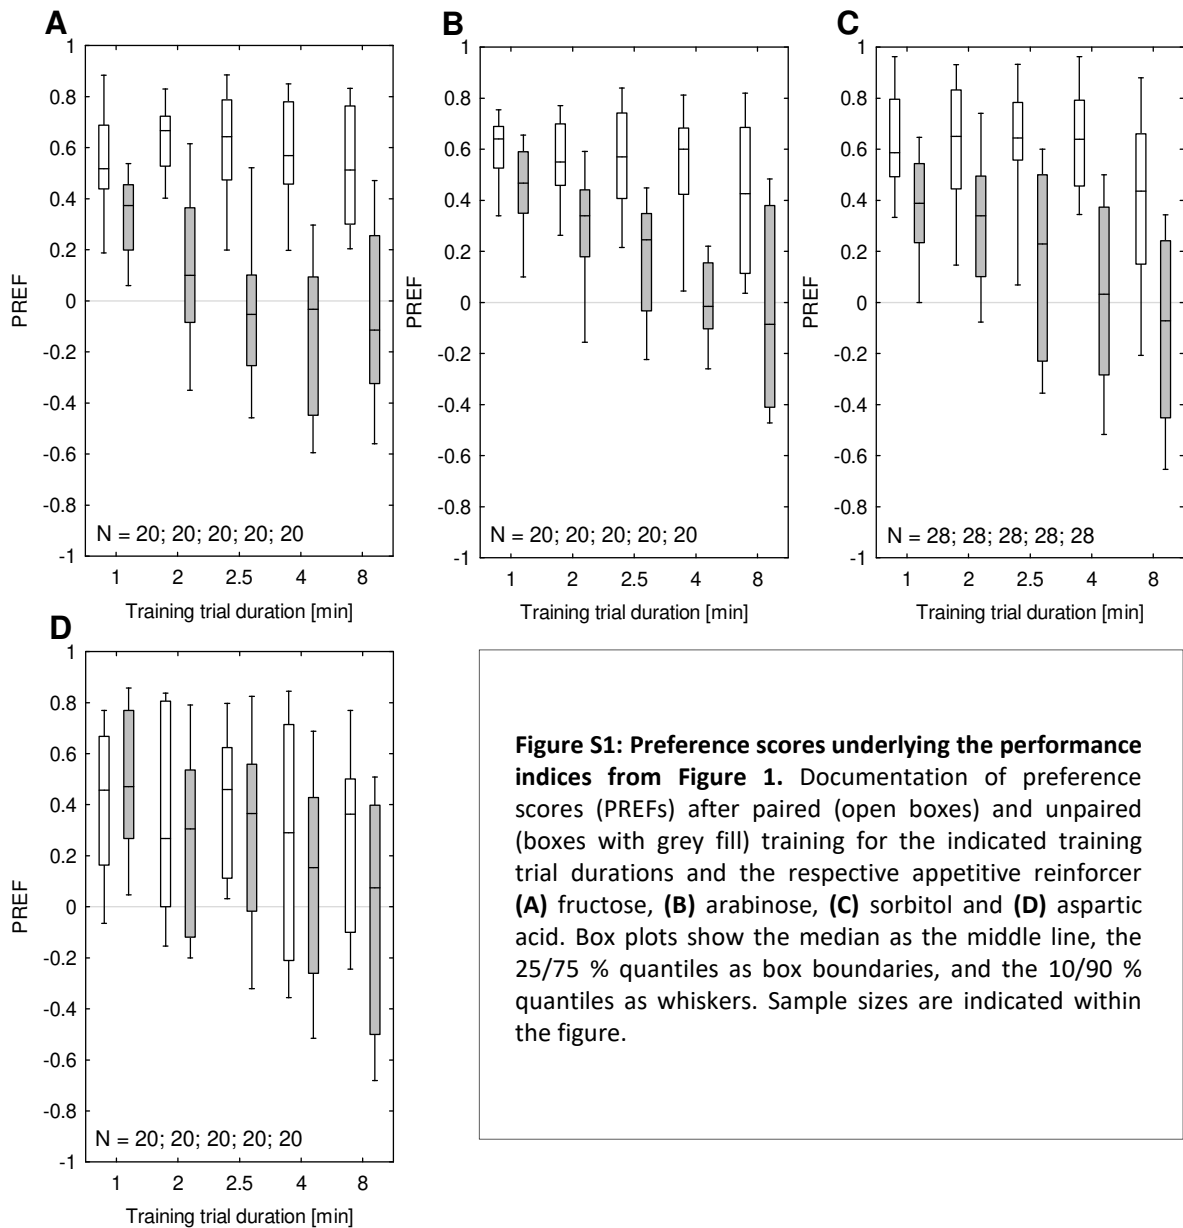

Supplement: supp_26.4.109_Supplemental_Fig_S1.pdf [file supp_26.4.109_Supplemental_Fig_S1.pdf]
